# Supplementary material for: Environmental Surveillance for Polioviruses in Haïti (2017–2019): The Dynamic Process for the Establishment and Monitoring of Sampling Sites
Source: PubMed Central journal article supplement (PMC8003210; doi:10.3390/v13030505), 2021-03-18

**Table S1.** Selected water quality measurements, time of day of collection, and general weather conditions at sites for samples collected through Haïti poliovirus environmental surveillance during March 2017 – December 2019. **Port au Prince:** BNF = Bois de Neuf, BDC = Bois de Chêne, MAC = Morne à Cabri, RRD = Route Rails Diquini, CAC = Cite au Cayes, CAR = Carrefour; **Gonaïves:** KHF = Key Soleil Health Facility, KSB = Key Soleil Bridge, ATP = Autorité Portuaire, ALL = Avenue Leon Legros, BRA = Boulevard de l’Avenir, KHS = Key Soleil School; **Saint Marc:** AMA = Avenue Maurepas, HUC = Impasse Hucar, and PET = Rue Petion; **Cap Haïtien:** CRC = Ruelle Caporis, RPA = Ruelle Patience, GRC = Grand Rue Champin, IMP = Impasse Petion, RNB = Route National Bridge, and CMB = Rivière Commerce Bridge.

| City           | Site Code | Total Sampling Events | Sample Temperature (°C) |        | Laboratory-measured pH |        | Sample Collection Time (hour:minute, AM or PM) |          | Percent of Sampling Events with Rain on Day Prior to Collection |                   | Percent of Sampling Events with Rain on Day of Collection |                   |
|----------------|-----------|-----------------------|-------------------------|--------|------------------------|--------|------------------------------------------------|----------|-----------------------------------------------------------------|-------------------|-----------------------------------------------------------|-------------------|
|                |           |                       | No. samples with data   | Median | No. samples with data  | Median | No. samples with data                          | Median   | No. samples with data                                           | No. (%) with rain | No. samples with data                                     | No. (%) with rain |
| Port au Prince | BNF       | 34                    | 24                      | 28.2   | 32                     | 7.0    | 31                                             | 8:18 AM  | 30                                                              | 8 (27)            | 29                                                        | 1 (3)             |
|                | BDC       | 34                    | 27                      | 29.4   | 32                     | 7.0    | 31                                             | 8:56 AM  | 29                                                              | 6 (21)            | 29                                                        | 1 (3)             |
|                | MAC       | 1                     | 1                       | 32.2   | 1                      | 7.2    | 1                                              | 12:12 PM | 1                                                               | 0 (0)             | 1                                                         | 0 (0)             |
|                | RRD       | 33                    | 25                      | 27.6   | 28                     | 6.8    | 31                                             | 9:28 AM  | 26                                                              | 8 (31)            | 26                                                        | 2 (8)             |
|                | CAC       | 4                     | 3                       | 29.4   | 4                      | 7.0    | 3                                              | 10:26 AM | 3                                                               | 1 (33)            | 3                                                         | 0 (0)             |
|                | CAR       | 4                     | 4                       | 28.6   | 4                      | 6.6    | 4                                              | 12:13 PM | 4                                                               | 2 (50)            | 4                                                         | 0 (0)             |
| Gonaïves       | KHF       | 16                    | 14                      | 27.2   | 13                     | 7.1    | 15                                             | 8:28 AM  | 15                                                              | 2 (13)            | 15                                                        | 0 (0)             |
|                | KSB       | 5                     | 5                       | 32.5   | 3                      | 7.0    | 5                                              | 1:21PM   | 5                                                               | 1 (20)            | 5                                                         | 0 (0)             |
|                | ATP       | 1                     | 1                       | 28.2   | 0                      | N/A    | 1                                              | 2:08 PM  | 1                                                               | 0 (0)             | 1                                                         | 0 (0)             |
|                | ALL       | 4                     | 4                       | 30.6   | 3                      | 7.0    | 4                                              | 11:37    | 4                                                               | 1 (25)            | 4                                                         | 0 (0)             |
|                | BRA       | 31                    | 23                      | 26.4   | 27                     | 7.2    | 28                                             | 7:20 AM  | 27                                                              | 2 (7)             | 27                                                        | 0 (0)             |
|                | KHS       | 4                     | 4                       | 32.8   | 2                      | 7.0    | 3                                              | 1:05 PM  | 4                                                               | 1 (25)            | 4                                                         | 0 (0)             |
| Saint Marc     | AMA       | 19                    | 14                      | 28.5   | 18                     | 7.0    | 18                                             | 8:50 AM  | 16                                                              | 2 (13)            | 16                                                        | 0 (0)             |
|                | HUC       | 16                    | 13                      | 27.6   | 16                     | 7.0    | 16                                             | 8:30 AM  | 12                                                              | 2 (17)            | 12                                                        | 0 (0)             |
|                | PET       | 6                     | 4                       | 28.6   | 7                      | 7.0    | 5                                              | 8:50 AM  | 5                                                               | 1 (20)            | 5                                                         | 0 (0)             |
| Cap Haïtien    | CRC       | 21                    | 15                      | 28.3   | 21                     | 7.0    | 20                                             | 8:22 AM  | 18                                                              | 1 (6)             | 19                                                        | 1 (5)             |
|                | RPA       | 21                    | 15                      | 27.3   | 21                     | 7.0    | 20                                             | 7:24 AM  | 18                                                              | 1 (6)             | 17                                                        | 1 (6)             |
|                | GRC       | 3                     | 3                       | 28.0   | 3                      | 7.0    | 3                                              | 8:48 AM  | 3                                                               | 0 (0)             | 3                                                         | 0 (0)             |
|                | IMP       | 5                     | 2                       | 31.5   | 5                      | 7.4    | 4                                              | 9:42 AM  | 4                                                               | 0 (0)             | 4                                                         | 0 (0)             |
|                | RNB       | 5                     | 1                       | 29.9   | 5                      | 7.0    | 4                                              | 8:34 AM  | 3                                                               | 0 (0)             | 4                                                         | 0 (0)             |
|                | CMB       | 5                     | 2                       | 30.8   | 5                      | 7.0    | 4                                              | 9:01 AM  | 3                                                               | 0 (0)             | 3                                                         | 0 (0)             |

N/A: Data not available

**Figure S1.** Enteroviruses isolated through Haïti poliovirus environmental surveillance during March 2017 – December 2019 by year, epidemiological week, sampling site, and processing method. Orange-shading for months in 2018 and May 2019 indicates periods of tetanus-diphtheria outbreak response campaigns in certain regions that provided an opportunity for intensified all-antigen vaccination and for July – September 2019 indicates the approximate time period of a nation-wide supplementary immunization activity targeting children 2-59 months of age with bivalent oral polio vaccine (bOPV, Sabin strain serotypes 1 and 3 containing). NPEV = non-polio enterovirus; SL1 = Sabin-like poliovirus of serotype 1; SL3 = Sabin-like poliovirus of serotype 3; TP = Two phase processing method; CA = CaFÉ processing method.

| Port-au-Prince            | 2017 |    |    |    |    |    |    |    |    |       | 2018  |       |       |       |       |       |       |       |       |       | 2019  |       |       |       |       |       |       |       |       |       |       |       |       |       |
|---------------------------|------|----|----|----|----|----|----|----|----|-------|-------|-------|-------|-------|-------|-------|-------|-------|-------|-------|-------|-------|-------|-------|-------|-------|-------|-------|-------|-------|-------|-------|-------|-------|
|                           | M    | A  | M  | J  | J  | A  | S  | O  | N  | D     | J     | F     | M     | A     | M     | J     | J     | A     | S     | O     | N     | D     | J     | F     | M     | A     | M     | J     | J     | A     | S     | O     | N     | D     |
|                           | TP   | TP | TP | TP | TP | TP | TP | TP | TP | TP CA | TP CA | TP CA | TP CA | TP CA | TP CA | TP CA | TP CA | TP CA | TP CA | TP CA | TP CA | TP CA | TP CA | TP CA | TP CA | TP CA | TP CA | TP CA | TP CA | TP CA | TP CA | TP CA | TP CA | TP CA |
| Epidemiological Week      | 13   | 16 | 21 | 24 | 29 | 35 | 39 | 43 | 48 | 51    | 4     | 9     | 13    | 17    | 21    | 26    | 30    | 34    | 39    | 43    | 48    | 51    | 5     | 9     | 13    | 17    | 22    | 26    | 30    | 33    | 39    | 44    | 48    | 52    |
| Bois Neuf (BNF)           |      |    |    |    |    |    |    |    |    |       |       |       |       |       |       |       |       |       |       |       |       |       |       |       |       |       |       |       |       |       |       |       |       |       |
| Bois de Chêne (BDC)       |      |    |    |    |    |    |    |    |    |       |       |       |       |       |       |       |       |       |       |       |       |       |       |       |       |       |       |       |       |       |       |       |       |       |
| Morne à Cabri (MAC)       |      |    |    |    |    |    |    |    |    |       |       |       |       |       |       |       |       |       |       |       |       |       |       |       |       |       |       |       |       |       |       |       |       |       |
| Route Rails Diquini (RRD) |      |    |    |    |    |    |    |    |    |       |       |       |       |       |       |       |       |       |       |       |       |       |       |       |       |       |       |       |       |       |       |       |       |       |
| Cite au Cayes (CAC)       |      |    |    |    |    |    |    |    |    |       |       |       |       |       |       |       |       |       |       |       |       |       |       |       |       |       |       |       |       |       |       |       |       |       |
| Carrefour (CAR)           |      |    |    |    |    |    |    |    |    |       |       |       |       |       |       |       |       |       |       |       |       |       |       |       |       |       |       |       |       |       |       |       |       |       |

| Gonaïves                         | 2017 |    |    |    |    |    |    |    |    |       | 2018  |       |       |       |       |       |       |       |       |       | 2019  |       |       |       |       |       |       |       |       |       |       |       |       |       |
|----------------------------------|------|----|----|----|----|----|----|----|----|-------|-------|-------|-------|-------|-------|-------|-------|-------|-------|-------|-------|-------|-------|-------|-------|-------|-------|-------|-------|-------|-------|-------|-------|-------|
|                                  | M    | A  | M  | J  | J  | A  | S  | O  | N  | D     | J     | F     | M     | A     | M     | J     | J     | A     | S     | O     | N     | D     | J     | F     | M     | A     | M     | J     | J     | A     | S     | O     | N     | D     |
|                                  | TP   | TP | TP | TP | TP | TP | TP | TP | TP | TP CA | TP CA | TP CA | TP CA | TP CA | TP CA | TP CA | TP CA | TP CA | TP CA | TP CA | TP CA | TP CA | TP CA | TP CA | TP CA | TP CA | TP CA | TP CA | TP CA | TP CA | TP CA | TP CA | TP CA | TP CA |
| Epidemiological Week             | 13   | 16 | 21 | 24 | 29 | 35 | 39 | 43 | 48 | 51    | 4     | 9     | 13    | 17    | 21    | 26    | 30    | 34    | 39    | 43    | 48    | 51    | 5     | 9     | 13    | 17    | 22    | 26    | 30    | 33    | 39    | 44    | 48    | 52    |
| Key Soleil Health Facility (KHF) |      |    |    |    |    |    |    |    |    |       |       |       |       |       |       |       |       |       |       |       |       |       |       |       |       |       |       |       |       |       |       |       |       |       |
| Key Soleil Bridge (KSB)          |      |    |    |    |    |    |    |    |    |       |       |       |       |       |       |       |       |       |       |       |       |       |       |       |       |       |       |       |       |       |       |       |       |       |
| Autorité Portuaire (ATP)         |      |    |    |    |    |    |    |    |    |       |       |       |       |       |       |       |       |       |       |       |       |       |       |       |       |       |       |       |       |       |       |       |       |       |
| Avenue Leon Legros (ALL)         |      |    |    |    |    |    |    |    |    |       |       |       |       |       |       |       |       |       |       |       |       |       |       |       |       |       |       |       |       |       |       |       |       |       |
| Boulevard de l'Avenir (BRA)      |      |    |    |    |    |    |    |    |    |       |       |       |       |       |       |       |       |       |       |       |       |       |       |       |       |       |       |       |       |       |       |       |       |       |
| Key Soleil School (KHS)          |      |    |    |    |    |    |    |    |    |       |       |       |       |       |       |       |       |       |       |       |       |       |       |       |       |       |       |       |       |       |       |       |       |       |

| Saint Marc            | 2017 |    |    |    |    |    |    |    |    |       | 2018  |       |       |       |       |       |       |       |       |       | 2019  |       |       |       |       |       |       |       |       |       |       |       |       |       |
|-----------------------|------|----|----|----|----|----|----|----|----|-------|-------|-------|-------|-------|-------|-------|-------|-------|-------|-------|-------|-------|-------|-------|-------|-------|-------|-------|-------|-------|-------|-------|-------|-------|
|                       | M    | A  | M  | J  | J  | A  | S  | O  | N  | D     | J     | F     | M     | A     | M     | J     | J     | A     | S     | O     | N     | D     | J     | F     | M     | A     | M     | J     | J     | A     | S     | O     | N     | D     |
|                       | TP   | TP | TP | TP | TP | TP | TP | TP | TP | TP CA | TP CA | TP CA | TP CA | TP CA | TP CA | TP CA | TP CA | TP CA | TP CA | TP CA | TP CA | TP CA | TP CA | TP CA | TP CA | TP CA | TP CA | TP CA | TP CA | TP CA | TP CA | TP CA | TP CA | TP CA |
| Epidemiological Week  | 13   | 16 | 21 | 24 | 29 | 35 | 39 | 43 | 48 | 51    | 4     | 9     | 13    | 17    | 21    | 26    | 30    | 34    | 39    | 43    | 48    | 51    | 5     | 9     | 13    | 17    | 22    | 26    | 30    | 33    | 39    | 44    | 48    | 52    |
| Avenue Maurepas (AMA) |      |    |    |    |    |    |    |    |    |       |       |       |       |       |       |       |       |       |       |       |       |       |       |       |       |       |       |       |       |       |       |       |       |       |
| Impasse Hucar (HUC)   |      |    |    |    |    |    |    |    |    |       |       |       |       |       |       |       |       |       |       |       |       |       |       |       |       |       |       |       |       |       |       |       |       |       |
| Rue Petion (PET)      |      |    |    |    |    |    |    |    |    |       |       |       |       |       |       |       |       |       |       |       |       |       |       |       |       |       |       |       |       |       |       |       |       |       |

| Cap Haïtien                   | 2017 |    |    |    |    |    |    |    |    |       | 2018  |       |       |       |       |       |       |       |       |       | 2019  |       |       |       |       |       |       |       |       |       |       |       |       |       |
|-------------------------------|------|----|----|----|----|----|----|----|----|-------|-------|-------|-------|-------|-------|-------|-------|-------|-------|-------|-------|-------|-------|-------|-------|-------|-------|-------|-------|-------|-------|-------|-------|-------|
|                               | M    | A  | M  | J  | J  | A  | S  | O  | N  | D     | J     | F     | M     | A     | M     | J     | J     | A     | S     | O     | N     | D     | J     | F     | M     | A     | M     | J     | J     | A     | S     | O     | N     | D     |
|                               | TP   | TP | TP | TP | TP | TP | TP | TP | TP | TP CA | TP CA | TP CA | TP CA | TP CA | TP CA | TP CA | TP CA | TP CA | TP CA | TP CA | TP CA | TP CA | TP CA | TP CA | TP CA | TP CA | TP CA | TP CA | TP CA | TP CA | TP CA | TP CA | TP CA | TP CA |
| Epidemiological Week          | 13   | 16 | 21 | 24 | 29 | 35 | 39 | 43 | 48 | 51    | 4     | 9     | 13    | 17    | 21    | 26    | 30    | 34    | 39    | 43    | 48    | 51    | 5     | 9     | 13    | 17    | 22    | 26    | 30    | 33    | 39    | 41    | 48    | 52    |
| Ruelle Caporis (CRC)          |      |    |    |    |    |    |    |    |    |       |       |       |       |       |       |       |       |       |       |       |       |       |       |       |       |       |       |       |       |       |       |       |       |       |
| Ruelle Patience (RPA)         |      |    |    |    |    |    |    |    |    |       |       |       |       |       |       |       |       |       |       |       |       |       |       |       |       |       |       |       |       |       |       |       |       |       |
| Grand Rue Champin (GRC)       |      |    |    |    |    |    |    |    |    |       |       |       |       |       |       |       |       |       |       |       |       |       |       |       |       |       |       |       |       |       |       |       |       |       |
| Impasse Petion (IMP)          |      |    |    |    |    |    |    |    |    |       |       |       |       |       |       |       |       |       |       |       |       |       |       |       |       |       |       |       |       |       |       |       |       |       |
| Route National Bridge (RNB)   |      |    |    |    |    |    |    |    |    |       |       |       |       |       |       |       |       |       |       |       |       |       |       |       |       |       |       |       |       |       |       |       |       |       |
| Rivière Commerce Bridge (CMB) |      |    |    |    |    |    |    |    |    |       |       |       |       |       |       |       |       |       |       |       |       |       |       |       |       |       |       |       |       |       |       |       |       |       |

TP = Two-phase separation method; CA = Concentration and Filter Elution filtration method (CaFÉ); CA\* = only selected samples processed using CA method this month.

Collection not scheduled or pressing method not used

Negative

NPEV

SL1 +/- NPEV

SL3 +/- NPEV

Collection not conducted due to civil insecurity



Supplement: viruses-13-00505-s001.pdf [file viruses-13-00505-s001.pdf]
